# Supplementary material for: Correlating nanoscale secondary ion mass spectrometry and atom probe tomography analysis of uranium enrichment in metallic nuclear fuel
Source: Royal Society of Chemistry journal article supplement (doi:10.1039/d0an01831g), 2020-11-02
Supplement: d0an01831g1.pdf [file d0an01831g1.pdf]

**Supplementary Information for:**

**Correlating Nanoscale Secondary Ion Mass Spectrometry and Atom Probe Tomography Analysis of Uranium Enrichment in Metallic Nuclear Fuel**

Elizabeth J. Kautz<sup>1</sup>, John Cliff<sup>2</sup>, Timothy G. Lach<sup>3+</sup>, Dallas Reilly<sup>1</sup>, Arun Devaraj<sup>4\*</sup>

<sup>1</sup>National Security Directorate, Pacific Northwest National Laboratory, 902 Battelle Boulevard, Richland, WA 99354

<sup>2</sup>Earth and Biological Sciences Directorate, Pacific Northwest National Laboratory, Richland, WA

<sup>3</sup>Energy and Environment Directorate, Pacific Northwest National Laboratory, Richland, WA

<sup>4</sup>Physical and Computational Sciences Directorate, Pacific Northwest National Laboratory, Richland, WA

<sup>+</sup>currently at Oak Ridge National Laboratory, 1 Bethel Valley Road, Oak Ridge, TN 37830

<sup>\*</sup>corresponding author (email: [arun.devaraj@pnnl.gov](mailto:arun.devaraj@pnnl.gov))

**Table of Contents**

|                                                                |    |
|----------------------------------------------------------------|----|
| Appendix 1: Sample Preparation for NanoSIMS.....               | S2 |
| Appendix 2: Atom Probe Tomography Mass Spectra.....            | S3 |
| Appendix 3: Atom Probe Tomography Data Sets and Analysis ..... | S5 |

## Appendix 1: Sample preparation for NanoSIMS

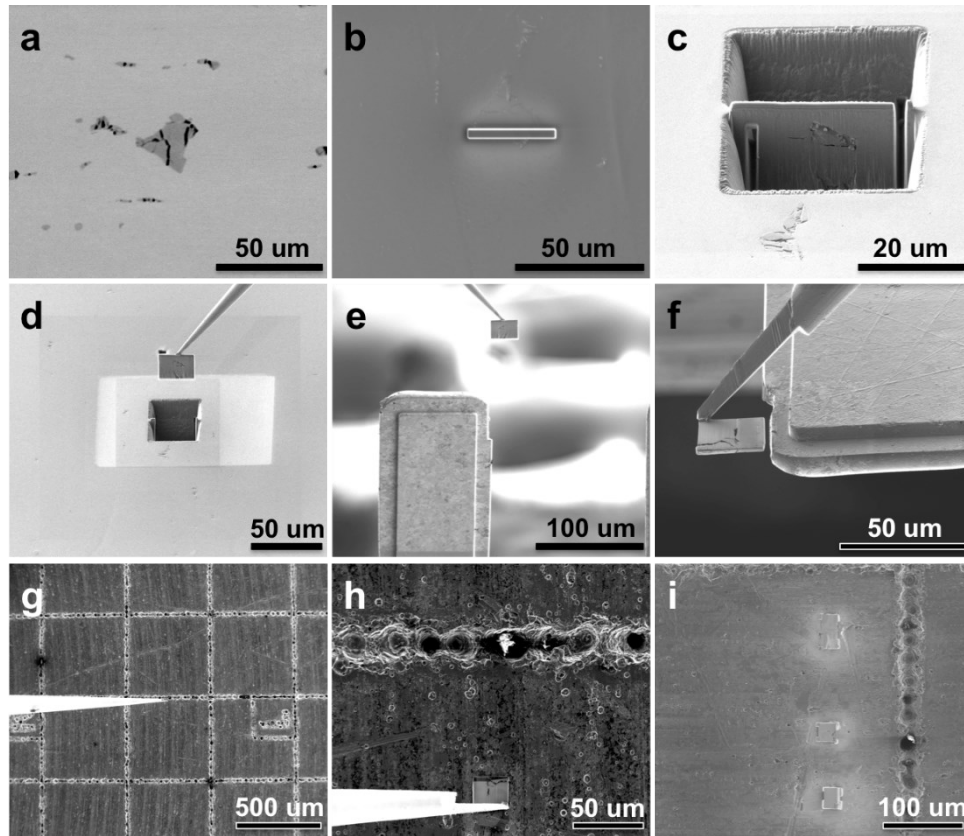

**Figure S1:** FIB based preparation of SIMS samples: (a) area of interest containing a UC inclusion is identified, (b) protective layer of C is deposited, (c) surrounding materials are moved and sample cut out, (d) sample is extracted, (e) sample is moved to and placed onto Cu half-grid, (f) sample is rotated and removed, (g-i) sample is moved to and deposited on a gridded wafer.

## Appendix 2: Atom Probe Tomography Mass Spectra

Figure S2 shows an APT reconstruction including a UC/ $\gamma$ -UMo interface, also presented in the body of the manuscript (showing composition and enrichment across the interface). The 3D element distribution maps shown in Figure S2(a)-(d) show the distribution of U isotopes detected via APT ( $^{234}\text{U}$ ,  $^{235}\text{U}$ ,  $^{238}\text{U}$ ). The full normalized mass spectra for  $\gamma$ -UMo and UC are shown in Figure S2 (e) and (g), respectively. The magnified view of  $\text{U}^{3+}$  isotopes in spectra are shown in Figure S2 (f) and (h) for  $\gamma$ -UMo and UC.  $^{234}\text{U}$ ,  $^{235}\text{U}$  and  $^{238}\text{U}$  are all detected via APT. To determine U isotopic composition via APT, the majority U species was used ( $\text{U}^{3+}$  elemental peak) [1]. The ranging criteria used for analysis is shown in Figure S3.

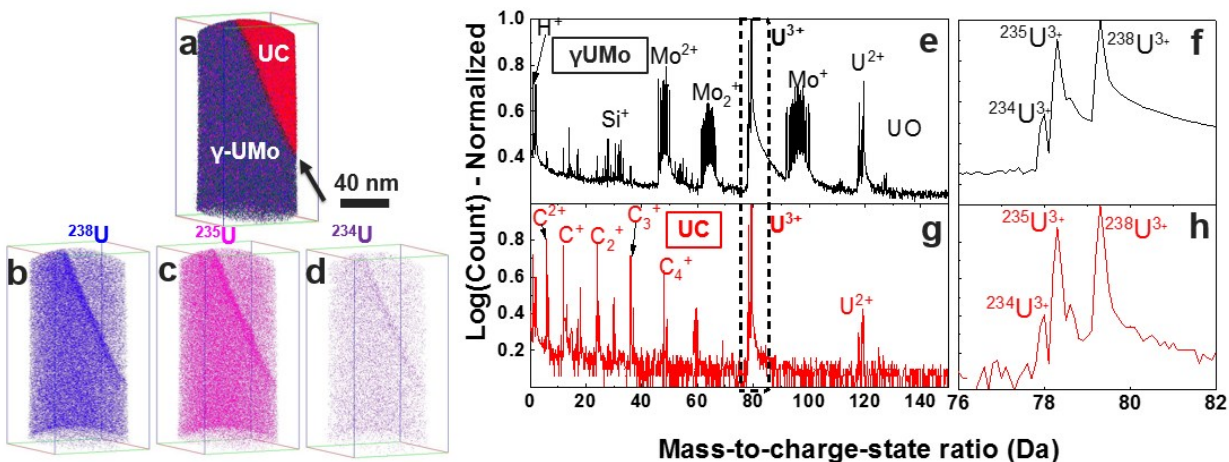

**Figure S2. U isotope distribution across the  $\gamma$ -UMo/UC interface.** (a) 3D element distribution maps of U, Mo, C and Si, (b) full mass spectra of the  $\gamma$ -UMo matrix phase, (c) mass spectra of the 76-84 Da range showing  $\text{U}^{3+}$  peaks ( $^{234}\text{U}$ ,  $^{235}\text{U}$ ,  $^{238}\text{U}$ ), (d) full mass spectrum for the UC phase, and (e) mass spectra of the 76-84 range for UC. 0.1 nm fixed bin width mass spectra are plotted above.

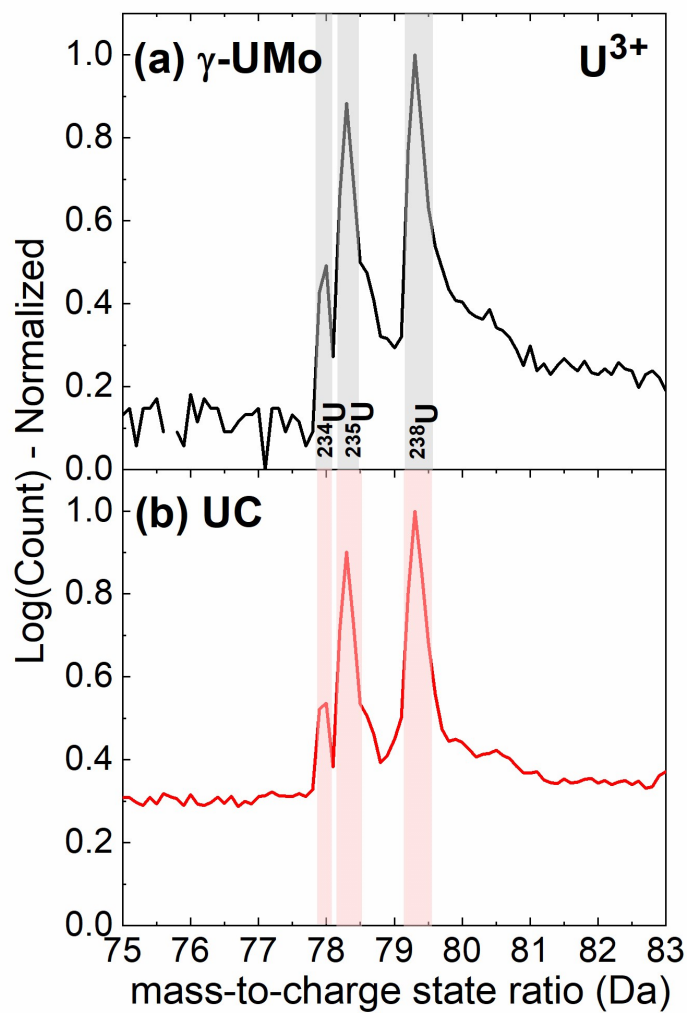

**Figure S3.** U isotope ranging criteria used in APT analysis of (a)  $\gamma$ -UMo and (b) UC phases. Each shaded box indicates the mass-to-charge state ratio ranged for each of the U isotopes.

### **Appendix 3: Atom Probe Tomography Data Sets and Analysis**

For each data set analyzed and presented in the body of the manuscript, the number of ions, ranged ions, and ion counts for U isotopes are presented in Table S1. The average enrichment and standard deviation for each phase is also presented.

**Table S1.** Number of ions in the reconstructed volume, ranged ion counts, and ion counts for  $^{234,235,238}\text{U}^{3+}$  for  $\gamma$ -UMo and UC APT data sets analyzed. Note that  $^{235}\text{U}$  enrichment reported in this table was calculated considering  $^{235}\text{U}$  and  $^{238}\text{U}$  counts for comparison with NanoSIMS measurements.

| Phase                                      | Data Set | Spectrum Count       | Spectrum Ranged Ion Count | Ion Count             |                       |                       | at. % $^{235}\text{U}$ (enrichment)* |
|--------------------------------------------|----------|----------------------|---------------------------|-----------------------|-----------------------|-----------------------|--------------------------------------|
|                                            |          |                      |                           | $^{238}\text{U}^{3+}$ | $^{235}\text{U}^{3+}$ | $^{234}\text{U}^{3+}$ |                                      |
| $\gamma$ -UMo Matrix                       | 1        | 3016097              | 2656152                   | 1484398               | 367818.2              | 2166.598              | 19.86                                |
|                                            | 2        | 2769240              | 2430970                   | 1372084               | 341265.9              | 2016.215              | 19.92                                |
|                                            | 3        | 4937493              | 4330250                   | 2413802               | 607933.2              | 3874                  | 20.12                                |
|                                            | 4        | 2178689              | 1916559                   | 1153954               | 276289.7              | 1553.518              | 19.32                                |
|                                            | 5        | 7765072              | 7083146                   | 4229451               | 1036536               | 5979.342              | 19.68                                |
|                                            | 6        | 16608694             | 8763052                   | 1554659               | 390136                | 11501                 | 20.06                                |
|                                            | 7        | 19,770,146           | 16,058,098                | 1.02E+07              | 2562693               | 17617.98              | 20.11                                |
|                                            | 8        | 7440022              | 6566129                   | 4127063               | 962011.3              | 6706.446              | 18.90                                |
|                                            | 9        | 5040425 <sup>+</sup> | 4741575                   | 2895118               | 718472                | 4449                  | 19.88                                |
| <b><i>Average ± Standard Deviation</i></b> |          |                      |                           |                       |                       |                       | <b><i>19.76 ± 0.4</i></b>            |
| UC                                         | 1        | 165366 <sup>+</sup>  | 154712                    | 83326                 | 21177                 | 151                   | 20.26                                |
|                                            | 2        | 5076015              | 2680782                   | 836032                | 208220                | 4583                  | 19.94                                |
|                                            | 3        | 819968               | 629706                    | 315840                | 80002.36              | 438.0024              | 20.21                                |
| <b><i>Average ± Standard Deviation</i></b> |          |                      |                           |                       |                       |                       | <b><i>20.14 ± 0.17</i></b>           |

<sup>+</sup>These data sets are sub-sets of a single APT needle reconstruction that captured a UC/UMo interface (as seen in Figure S2). The UC data sets here refers to a sphere 30 nm by 30 nm by 30 nm in size. The enrichment was calculated from the mass spectrum analysis within this sphere.

\* $^{235}\text{-U}$  at. % calculated as follows:  $[(235 - \text{U}^{3+}) / (235 - \text{U}^{3+} + 238 - \text{U}^{3+})] \times 100$

Consideration of  $^{234}\text{U}$  counts results in  $< 1$  at. % change in calculated enrichment, and is not considered here for direct comparison with NanoSIMS data that calculates enrichment using  $^{235}\text{U}$  and  $^{238}\text{U}$  isotopes only.

### **References**

- [1] E. J. Kautz, D.E. Burkes, V.V. Joshi, C. Lavendar, A. Devaraj, Arun, "Nanoscale spatially resolved mapping of uranium enrichment " *Scientific Reports*, no. 9, 2019.
